# Supplementary material for: Thymosin α-1 does not correct F508del-CFTR in cystic fibrosis airway epithelia
Source: JCI journal article supplement (doi:10.1172/jci.insight.98699), 2018-02-07
Supplement: sd1 [file 1]

LC-MS/MS SEQUENCE ANALYSIS OF  
SYNTHETIC THYMOSIN 1 $\alpha$  PURCHASED  
FROM TWO DIFFERENT VENDORS

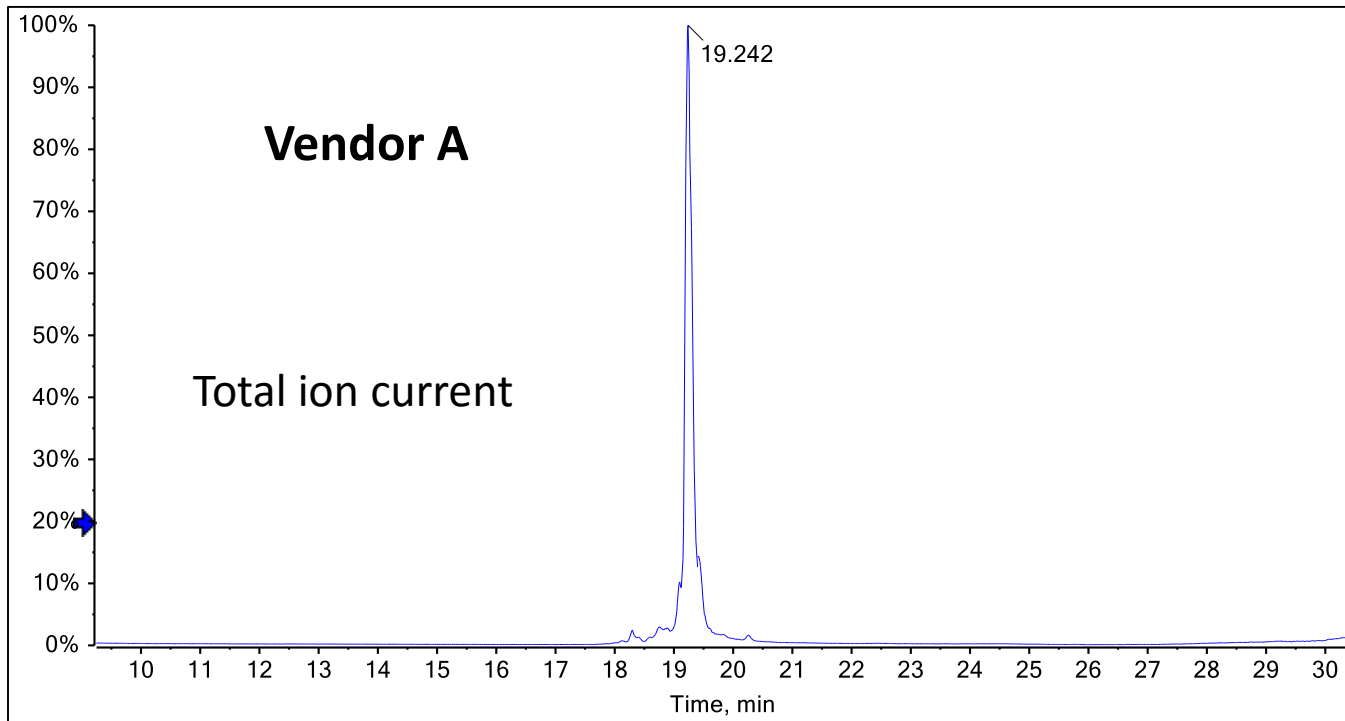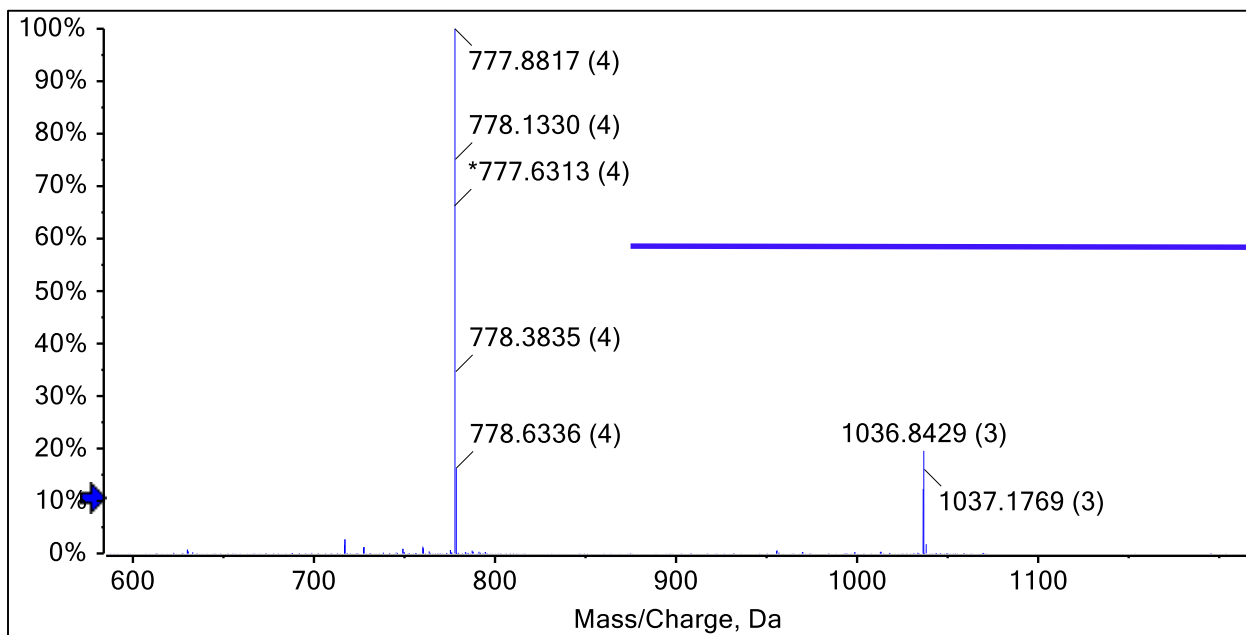

**Charge state 4 isotopic profile**

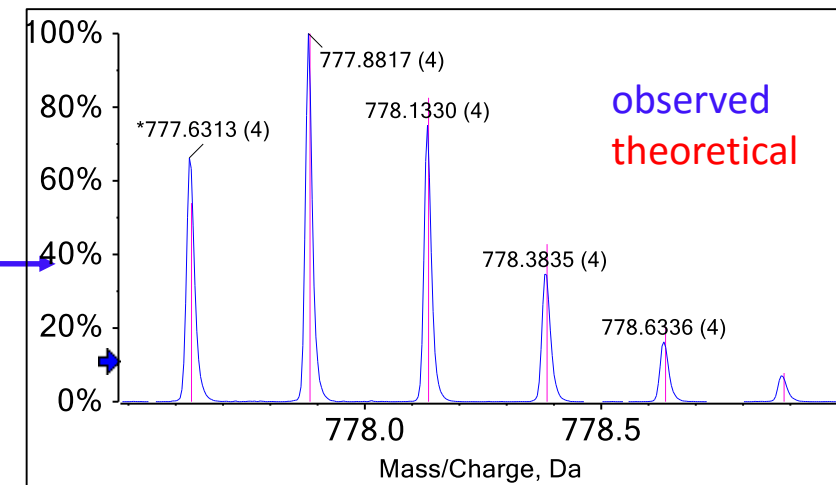

Calculated monoisotopic mass: **777.63331  $m/z$**   
Measured monoisotopic mass: **777.63370  $m/z$**   
**Mass error = 0.5 ppm**

MS<sup>2</sup> spectrum of 777.6330 *m/z* with fragment ions for sequence [Ac]-SDAAVDTSEITTKDLKEKKEVVEEAEN outlined (10X magnification where indicated)

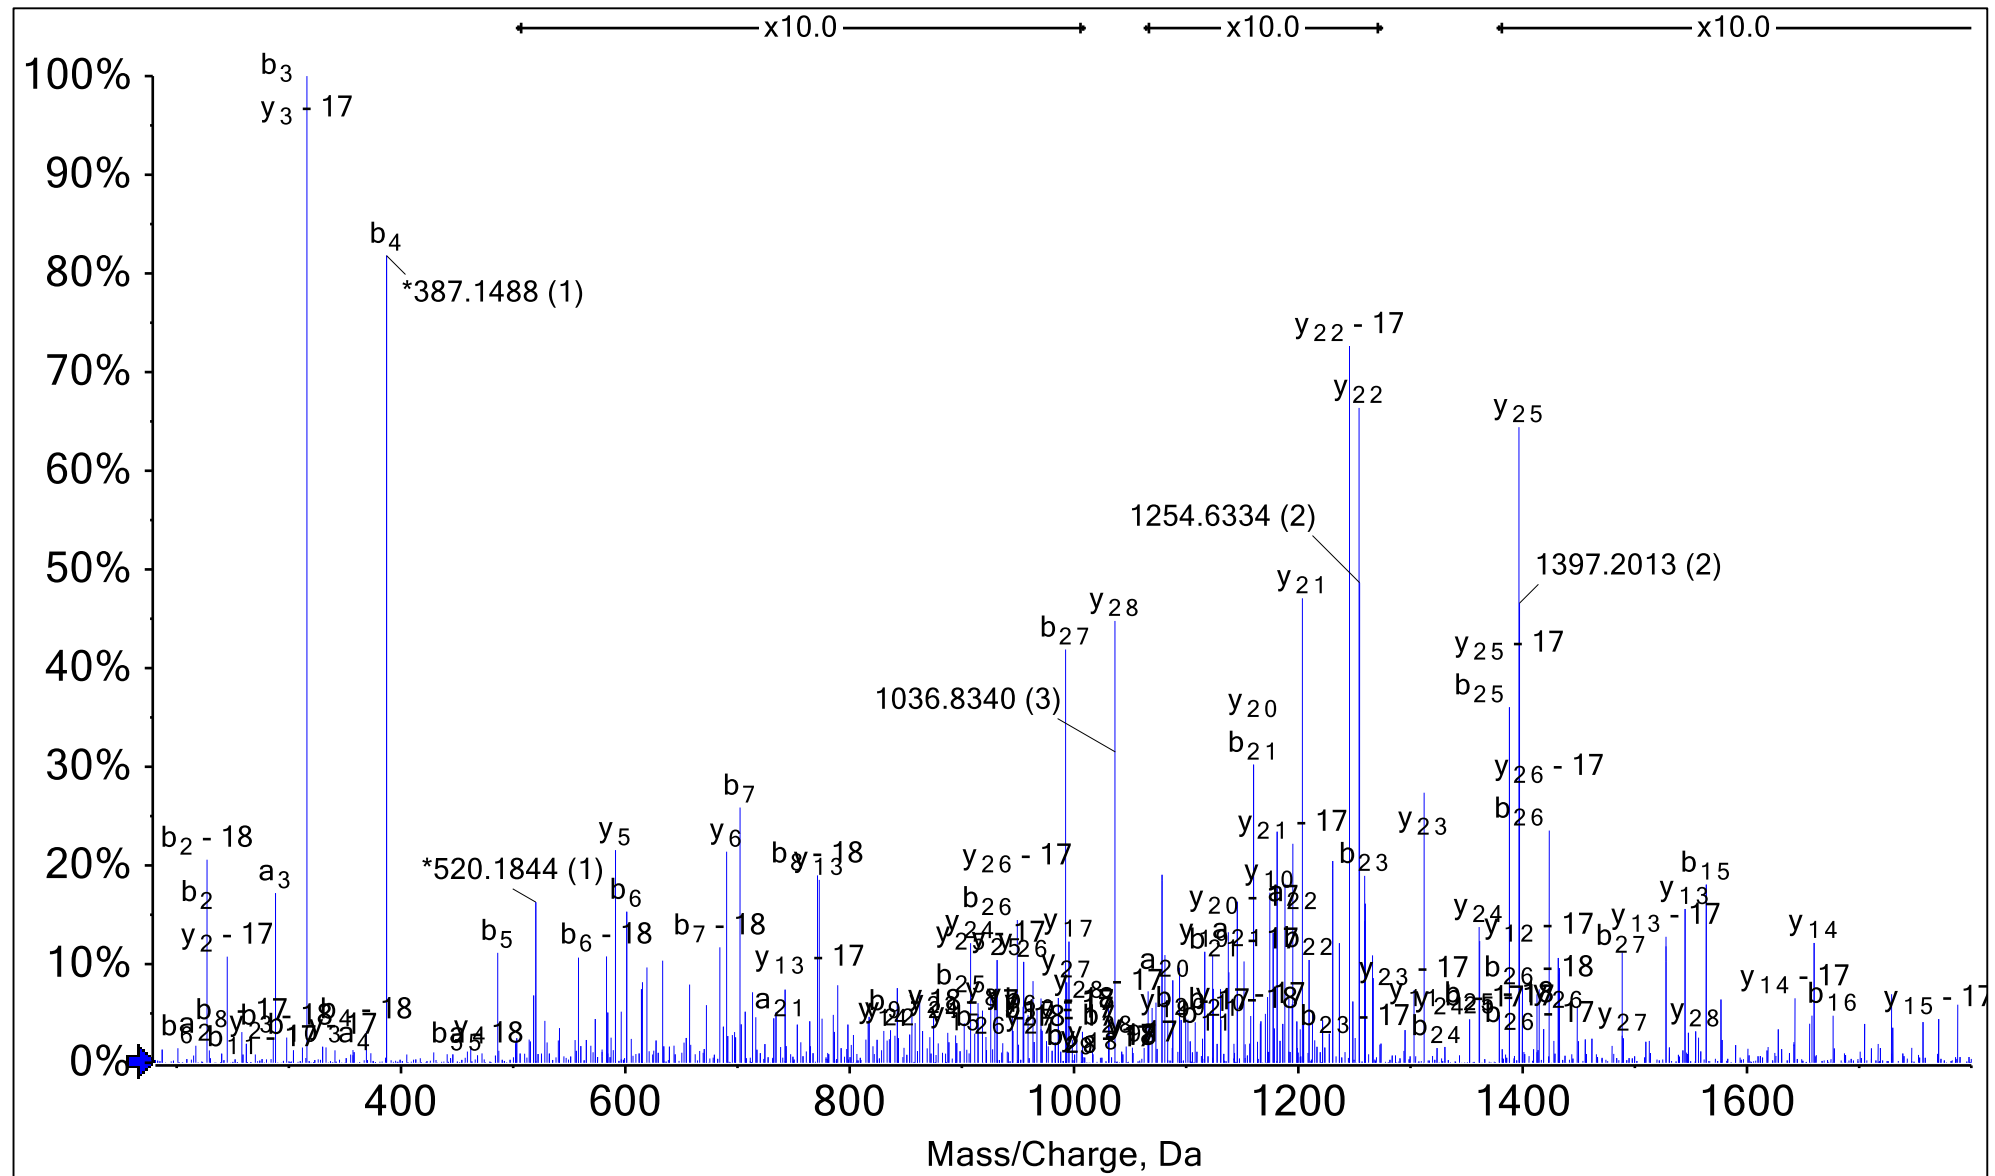

Observed fragment ions matching sequence  
[Ac]-SDAAVDTSS~~ITTKDLKEKKEVVEE~~AE~~N~~  
are indicated in **bold red** (max 5ppm mass accuracy)

Sequence: [1Ac]-SDAAVDTSS~~ITTKDLKEKKEVVEE~~AE~~N~~

Table List

| Symbol | Res. Mass | # (N) | b                 | y                 | # (C) |
|--------|-----------|-------|-------------------|-------------------|-------|
| S      | 87.03203  | 1     | 65.52857          | <b>1554.25934</b> | 28    |
| D      | 115.02694 | 2     | <b>123.04204</b>  | <b>1489.73805</b> | 27    |
| A      | 71.03711  | 3     | <b>158.56060</b>  | <b>1432.22457</b> | 26    |
| A      | 71.03711  | 4     | <b>194.07916</b>  | <b>1396.70602</b> | 25    |
| V      | 99.06841  | 5     | <b>243.61337</b>  | <b>1361.18746</b> | 24    |
| D      | 115.02694 | 6     | <b>301.12684</b>  | <b>1311.65325</b> | 23    |
| T      | 101.04768 | 7     | <b>351.65068</b>  | <b>1254.13978</b> | 22    |
| S      | 87.03203  | 8     | 395.16669         | <b>1203.61594</b> | 21    |
| S      | 87.03203  | 9     | <b>438.68270</b>  | <b>1160.09993</b> | 20    |
| E      | 129.04259 | 10    | <b>503.20400</b>  | <b>1116.58391</b> | 19    |
| I      | 113.08406 | 11    | <b>559.74603</b>  | <b>1052.06262</b> | 18    |
| T      | 101.04768 | 12    | <b>610.26987</b>  | <b>995.52058</b>  | 17    |
| T      | 101.04768 | 13    | 660.79371         | <b>944.99675</b>  | 16    |
| K      | 128.09496 | 14    | 724.84119         | <b>894.47291</b>  | 15    |
| D      | 115.02694 | 15    | <b>782.35467</b>  | <b>830.42542</b>  | 14    |
| L      | 113.08406 | 16    | <b>838.89670</b>  | <b>772.91195</b>  | 13    |
| K      | 128.09496 | 17    | 902.94418         | <b>716.36992</b>  | 12    |
| E      | 129.04259 | 18    | 967.46548         | <b>652.32244</b>  | 11    |
| K      | 128.09496 | 19    | <b>1031.51296</b> | <b>587.80114</b>  | 10    |
| K      | 128.09496 | 20    | <b>1095.56044</b> | <b>523.75366</b>  | 9     |
| E      | 129.04259 | 21    | 1160.08174        | <b>459.70618</b>  | 8     |
| V      | 99.06841  | 22    | <b>1209.61594</b> | 395.18488         | 7     |
| V      | 99.06841  | 23    | <b>1259.15015</b> | <b>345.65068</b>  | 6     |
| E      | 129.04259 | 24    | <b>1323.67145</b> | <b>296.11647</b>  | 5     |
| E      | 129.04259 | 25    | <b>1388.19274</b> | <b>231.59517</b>  | 4     |
| A      | 71.03711  | 26    | <b>1423.71130</b> | <b>167.07388</b>  | 3     |
| E      | 129.04259 | 27    | <b>1488.23260</b> | <b>131.55532</b>  | 2     |
| N      | 114.04293 | 28    | <b>1545.25406</b> | 67.03402          | 1     |

Magnified regions  
of MS<sup>2</sup> spectrum  
with labeled  
fragment ions

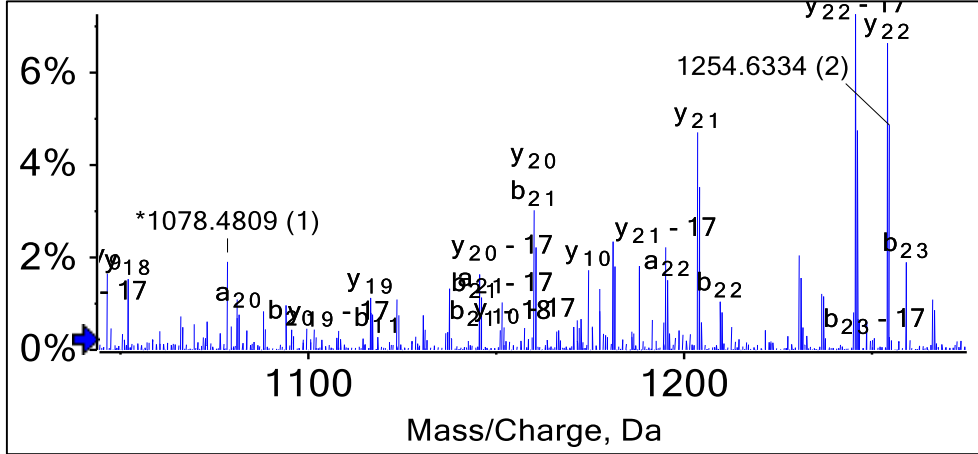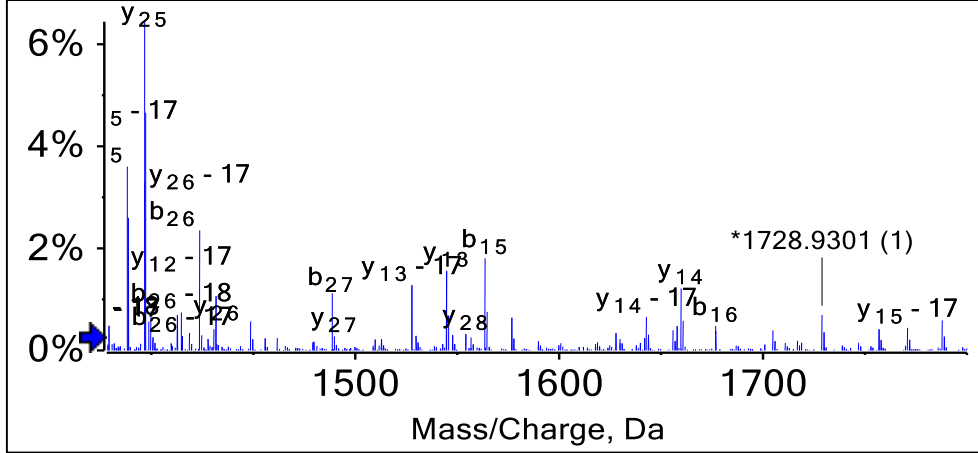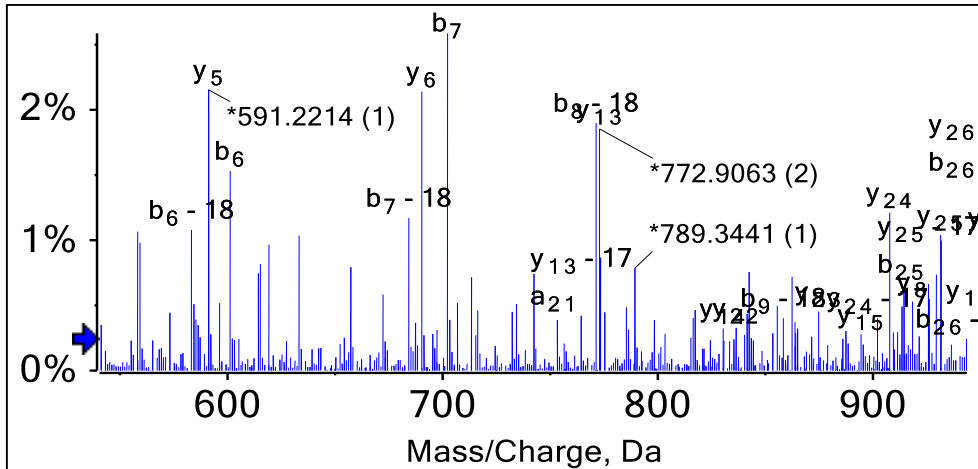

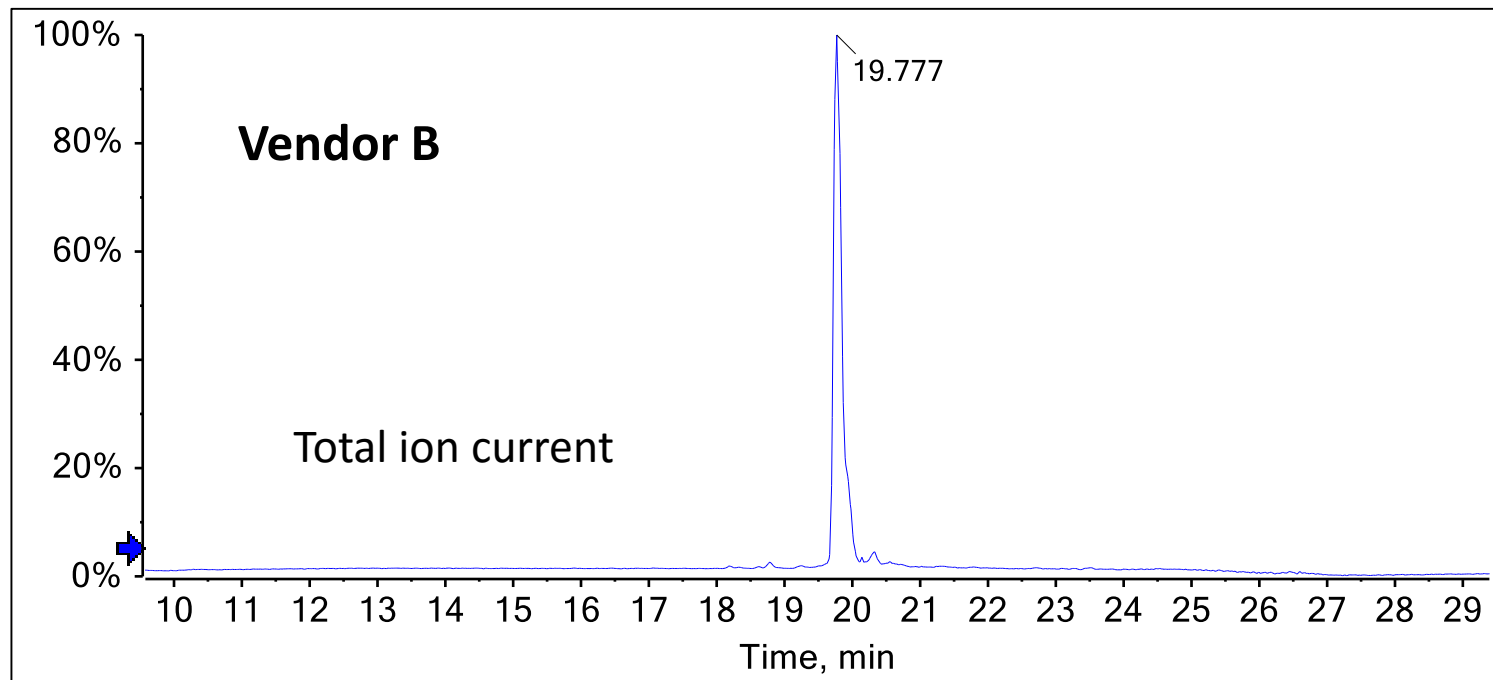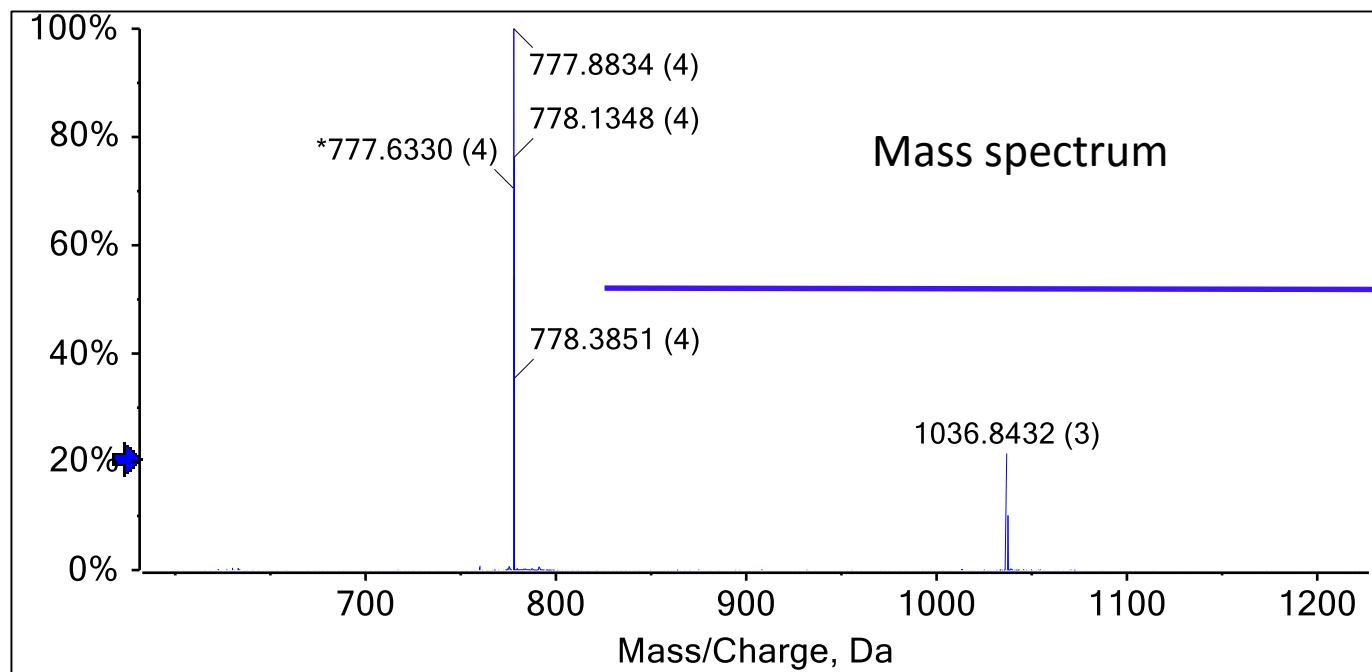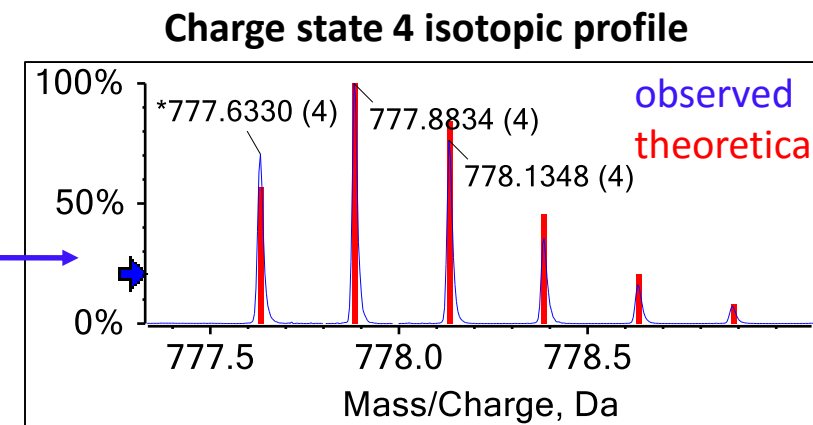

**Measured monoisotopic mass: 777.63303  $m/z$**   
**Calculated monoisotopic mass: 777.63331  $m/z$**   
**Mass error: -0.4 ppm**

MS<sup>2</sup> spectrum of 777.6330 *m/z* with fragment ions for sequence [Ac]-SDAAVDTSEITTKDLKEKKEVVEEAEN outlined (10X magnification where indicated)

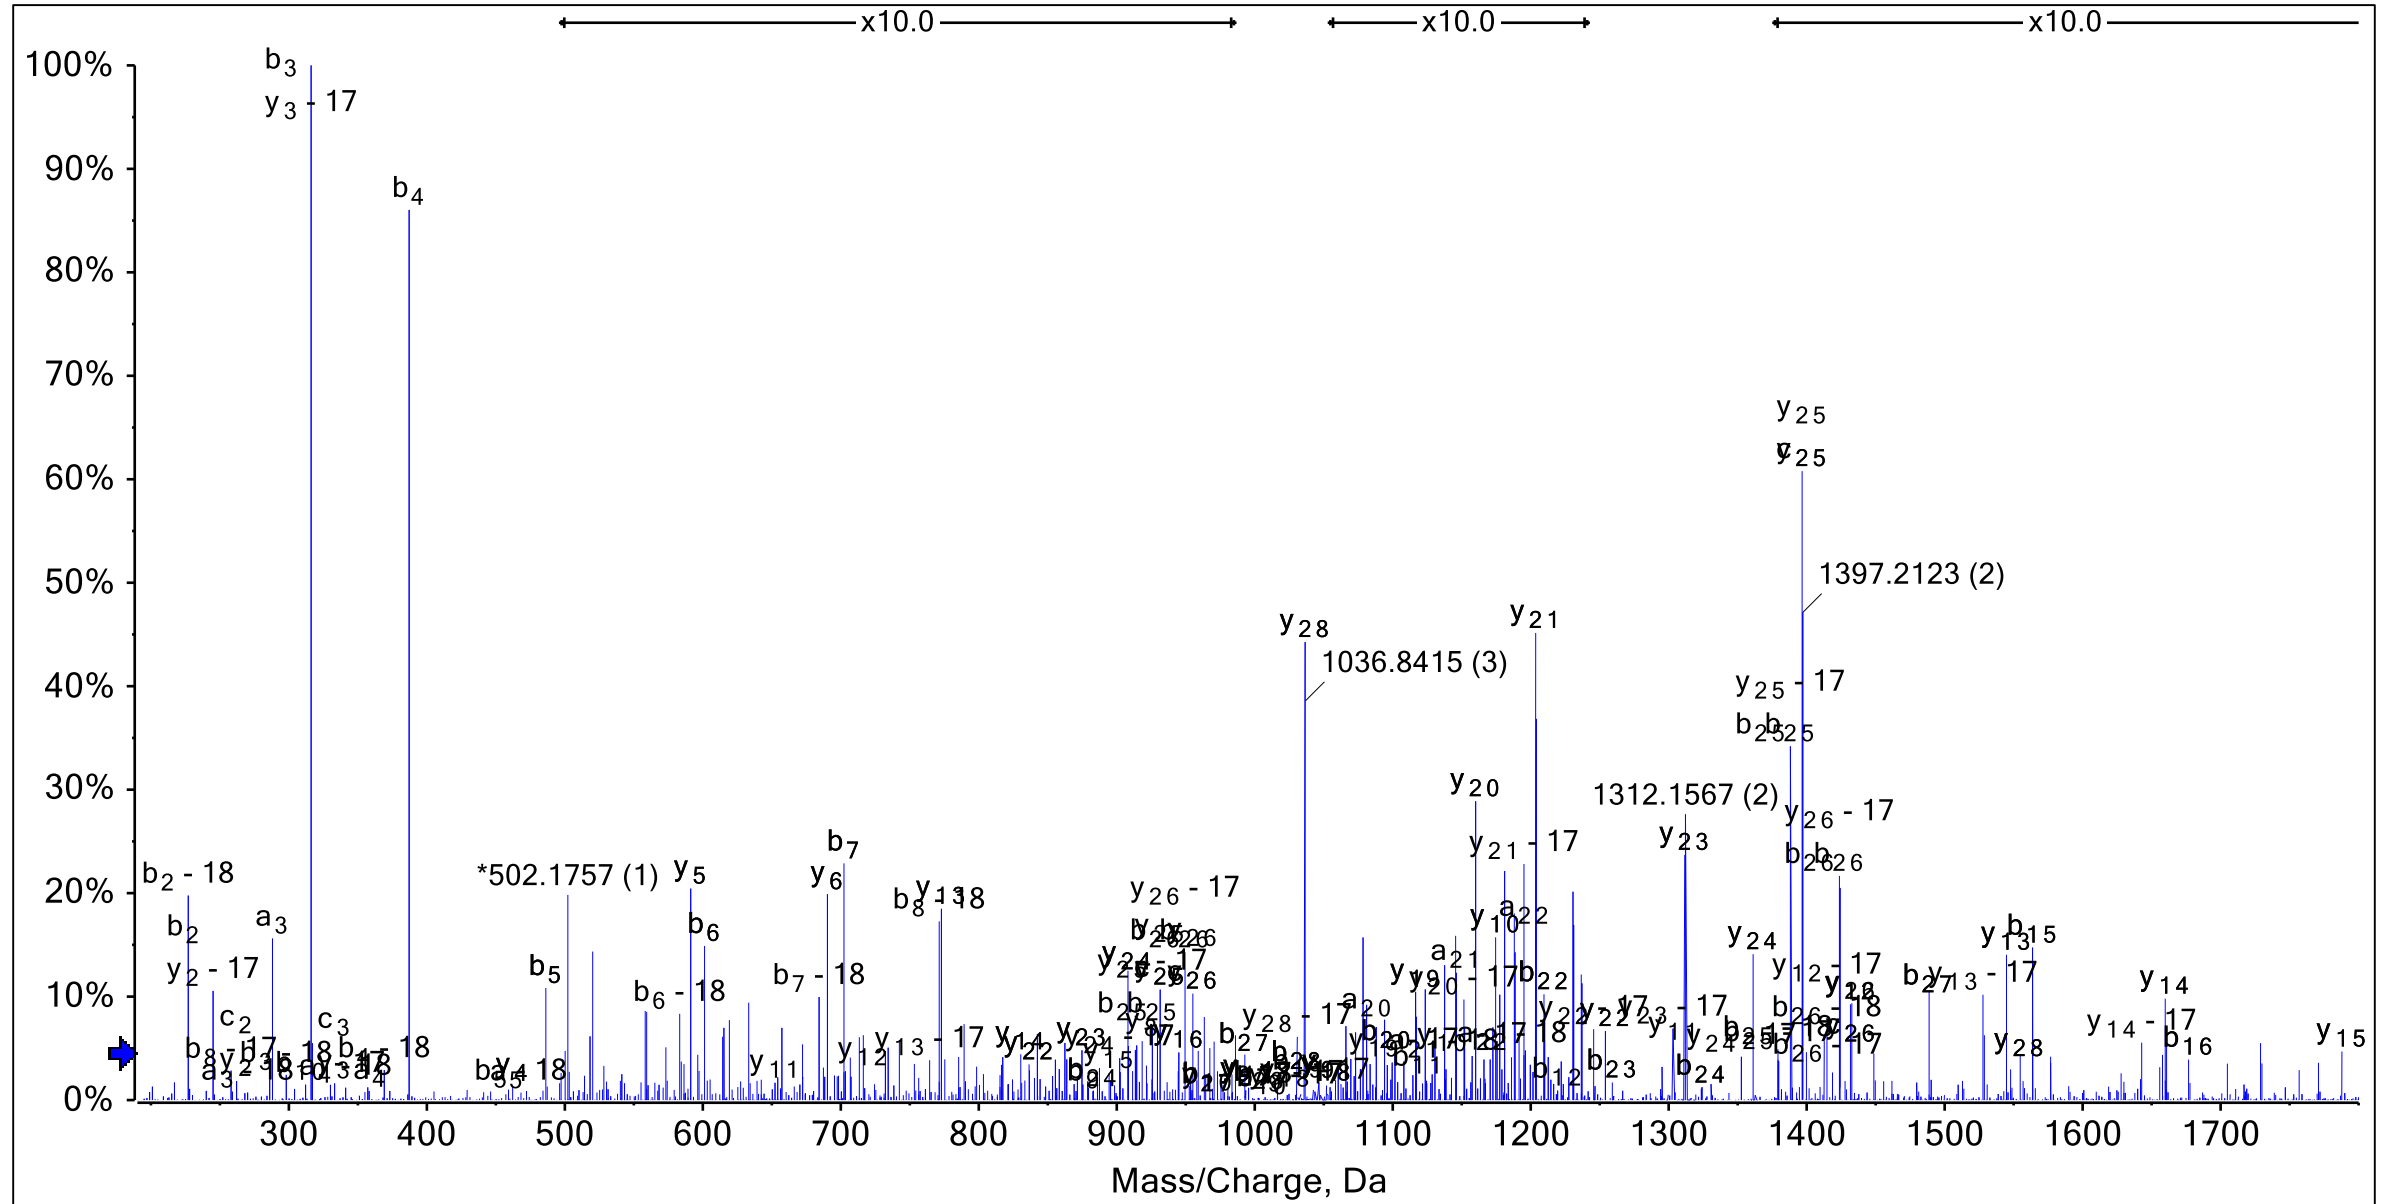

Observed fragment ions matching sequence  
[Ac]-SDAAVDTSS~~ITTKDLKEKKEVVEEA~~EN  
are indicated in **bold red** (max 5ppm mass accuracy)

Sequence: [1Ac]-SDAAVDTSS~~ITTKDLKEKKEVVEEA~~EN

Table List

|   | Symbol | Res. Mass | # (N) | b                 | y                 | # (C) |
|---|--------|-----------|-------|-------------------|-------------------|-------|
|   | S      | 87.03203  | 1     | 65.52857          | <b>1554.25934</b> | 28    |
|   | D      | 115.02694 | 2     | 123.04204         | <b>1489.73805</b> | 27    |
|   | A      | 71.03711  | 3     | 158.56060         | <b>1432.22457</b> | 26    |
|   | A      | 71.03711  | 4     | 194.07916         | <b>1396.70602</b> | 25    |
|   | V      | 99.06841  | 5     | <b>243.61337</b>  | <b>1361.18746</b> | 24    |
|   | D      | 115.02694 | 6     | <b>301.12684</b>  | <b>1311.65325</b> | 23    |
|   | T      | 101.04768 | 7     | <b>351.65068</b>  | <b>1254.13978</b> | 22    |
|   | S      | 87.03203  | 8     | 395.16669         | <b>1203.61594</b> | 21    |
|   | S      | 87.03203  | 9     | <b>438.68270</b>  | <b>1160.09993</b> | 20    |
|   | E      | 129.04259 | 10    | <b>503.20400</b>  | <b>1116.58391</b> | 19    |
|   | I      | 113.08406 | 11    | <b>559.74603</b>  | <b>1052.06262</b> | 18    |
|   | T      | 101.04768 | 12    | <b>610.26987</b>  | <b>995.52058</b>  | 17    |
|   | T      | 101.04768 | 13    | 660.79371         | <b>944.99675</b>  | 16    |
|   | K      | 128.09496 | 14    | 724.84119         | <b>894.47291</b>  | 15    |
|   | D      | 115.02694 | 15    | <b>782.35467</b>  | <b>830.42542</b>  | 14    |
|   | L      | 113.08406 | 16    | <b>838.89670</b>  | <b>772.91195</b>  | 13    |
|   | K      | 128.09496 | 17    | 902.94418         | <b>716.36992</b>  | 12    |
|   | E      | 129.04259 | 18    | 967.46548         | <b>652.32244</b>  | 11    |
|   | K      | 128.09496 | 19    | 1031.51296        | <b>587.80114</b>  | 10    |
| ▶ | K      | 128.09496 | 20    | <b>1095.56044</b> | <b>523.75366</b>  | 9     |
|   | E      | 129.04259 | 21    | 1160.08174        | 459.70618         | 8     |
|   | V      | 99.06841  | 22    | <b>1209.61594</b> | 395.18488         | 7     |
|   | V      | 99.06841  | 23    | <b>1259.15015</b> | <b>345.65068</b>  | 6     |
|   | E      | 129.04259 | 24    | <b>1323.67145</b> | <b>296.11647</b>  | 5     |
|   | E      | 129.04259 | 25    | <b>1388.19274</b> | <b>231.59517</b>  | 4     |
|   | A      | 71.03711  | 26    | <b>1423.71130</b> | 167.07388         | 3     |
|   | E      | 129.04259 | 27    | <b>1488.23260</b> | 131.55532         | 2     |
|   | N      | 114.04293 | 28    | <b>1545.25406</b> | 67.03402          | 1     |

Magnified regions  
of MS<sup>2</sup> spectrum  
with labeled  
fragment ions

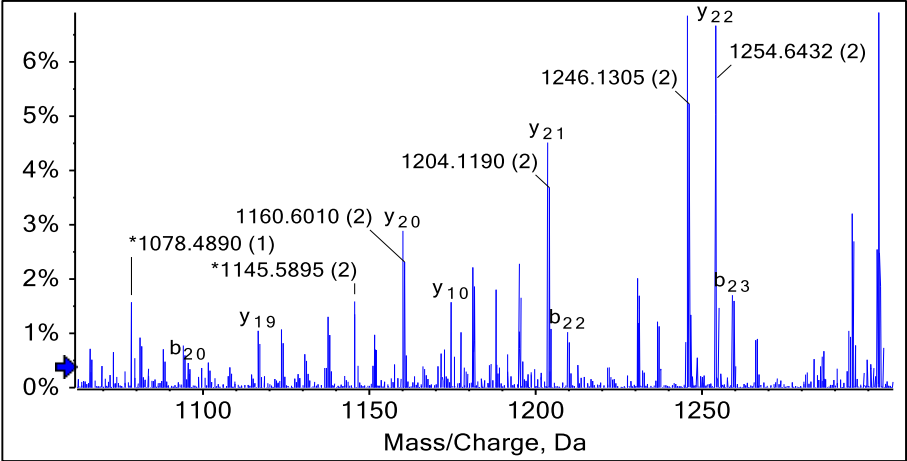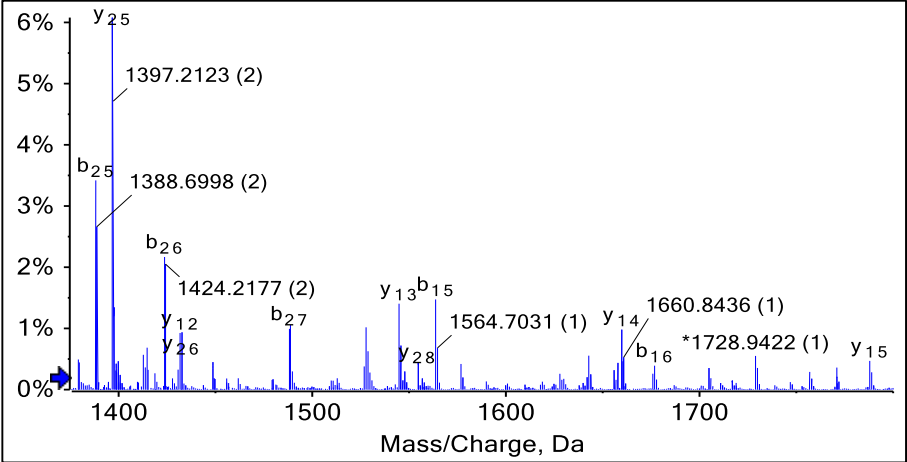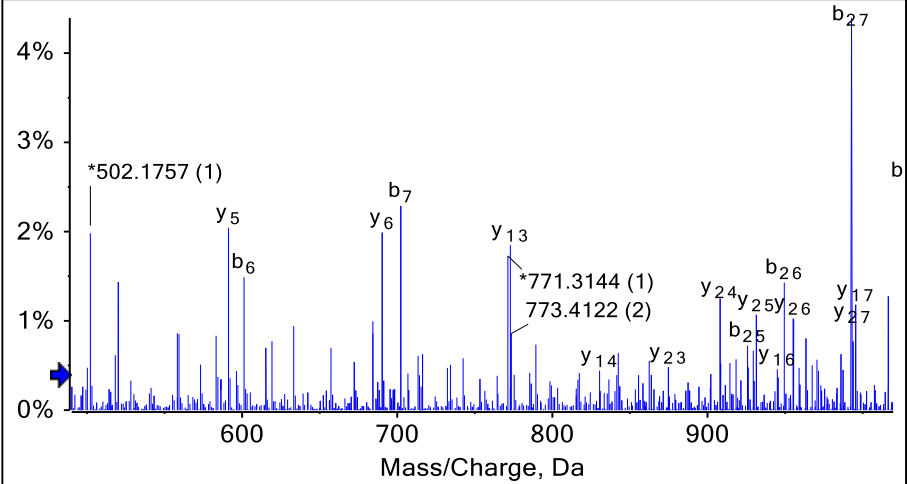

## CONCLUSIONS

- The observed peptide mass for Thymosin 1a from both Vendors matches the calculated one
- Thymosin 1 $\alpha$  sequence [Ac]-SDAAVDTSSEITTKDLKEKKEVVEEAEN is fully confirmed by MS/MS data for both Vendors
